# Supplementary material
Source: PubMed Central journal article supplement (PMC3026631)
Supplement: NIHMS253455-supplement-01.pdf [file NIHMS253455-supplement-01.pdf]

## Supplemental tables

**Table S1. Efficiency of site-specific photocrosslinking *in vivo*, related to Figure 4.**

Photo-crosslinking was performed with probes at positions at which maximum crosslinking was observed for the various components. The percentage of sCPY\*-DHFR-HA crosslinked was estimated after immunoprecipitation with Myc antibodies followed by immunoblotting with HA antibodies. Serial dilution of the extract were loaded on the same gel and served as reference. The percentage of the ERAD components and of Sec61p crosslinked to substrate was estimated from reciprocal immunoprecipitation experiments.

| Percentage of sCPY*-DHFR-HA<br>crosslinked to |                |
|-----------------------------------------------|----------------|
| Hrd1p                                         | .06-.3         |
| Hrd3p                                         | 0.1            |
| Der1p                                         | .01-.02        |
| Sec61p                                        | not detectable |

| Percentage of component crosslinked to<br>sCPY*-DHFR-HA |        |
|---------------------------------------------------------|--------|
| Hrd1p                                                   | .05-.1 |
| Hrd3p                                                   | 0.1    |
| Der1p                                                   | 0.02   |
| Sec61p                                                  | 0.0005 |

**Table S2. Yeast strains used in this study**

| <b>Strain</b>  | <b>Genotype</b>                                                                         | <b>Source</b>         |
|----------------|-----------------------------------------------------------------------------------------|-----------------------|
| <i>BY4741</i>  | <i>MATa ura3Δ0 his3Δ1 leu2Δ0 met15Δ0</i>                                                | OpenBiosystems        |
| <i>BY4742</i>  | <i>MATα ura3Δ0 his3Δ1 leu2Δ0 lys2Δ0</i>                                                 | OpenBiosystems        |
| <i>FY250</i>   | <i>MATα ura3-52 leu2Δ1 trp1Δ63 his3Δ200</i>                                             | Winston et al., 1995  |
| <i>FY251</i>   | <i>MATa ura3-52 leu2Δ1 trp1Δ63 his3Δ200</i>                                             | Winston et al., 1995  |
| <i>yPC1659</i> | <i>MATa ura3-52 leu2Δ1 trp1Δ63 his3Δ200 hrd1::KANR npl4-1</i>                           | This study            |
| <i>yPC1664</i> | <i>MATa ura3-52 leu2Δ1 trp1Δ63 his3Δ200 hrd1::KANR cdc48-3</i>                          | This study            |
| <i>yPC1790</i> | <i>MAT a ura3D0 his3D1 leu2D0 met15D0 usa1::KANR</i>                                    | Carvalho et al., 2006 |
| <i>yPC2247</i> | <i>MATa ura3-52 leu2Δ1 trp1Δ63 his3Δ200 hrd1::HYGB</i>                                  | This study            |
| <i>yPC2329</i> | <i>MATα ura3Δ0 his3Δ1 leu2Δ0 lys2Δ0 HIS-GALp-6his-Hrd1</i>                              | This study            |
| <i>yPC2339</i> | <i>MATα ura3Δ0 his3Δ1 leu2Δ0 lys2Δ0 HIS-GALp-6his-Hrd1<br/>hrd3::KANR</i>               | This study            |
| <i>yPC2357</i> | <i>MATα ura3Δ0 his3Δ1 leu2Δ0 lys2Δ0 HIS-GALp-6his-Hrd1<br/>hrd3::KANR der1::HYGB</i>    | This study            |
| <i>yPC2382</i> | <i>MATα ura3Δ0 his3Δ1 leu2Δ0 lys2Δ0 HIS-GALp-6his-Hrd1<br/>usa1::HYGB</i>               | This study            |
| <i>yPC2383</i> | <i>MATα ura3Δ0 his3Δ1 leu2Δ0 lys2Δ0 HIS-GALp-6his-Hrd1<br/>der1::HYGB</i>               | This study            |
| <i>yPC2438</i> | <i>MATa ura3Δ0 his3Δ1 leu2Δ0 HIS-GALp-6his-Hrd1 hrd3::KANR<br/>usa1::NAT der1::HYGB</i> | This study            |
| <i>yPC2476</i> | <i>MATα ura3Δ0 his3Δ1 leu2Δ0 lys2Δ0 HIS-GALp-6his-Hrd1<br/>ubc7::KANR</i>               | This study            |
| <i>yPC2610</i> | <i>MATa ura3Δ0 his3Δ1 leu2Δ0 met15Δ0 Hrd1-13myc-KANR<br/>usa1::HYGB</i>                 | This study            |
| <i>yPC3098</i> | <i>MATa ura3-52 leu2Δ1 trp1Δ63 his3Δ200 Hrd1-13myc-KANR</i>                             | This study            |
| <i>yPC3129</i> | <i>MATa ura3-52 leu2Δ1 trp1Δ63 his3Δ200 Hrd1-13myc-KANR<br/>cdc48-3</i>                 | This study            |
| <i>yPC3176</i> | <i>MATa ura3-52 leu2Δ1 trp1Δ63 his3Δ200 mini-hrd1</i>                                   | This study            |
| <i>yPC3184</i> | <i>MATa ura3-52 leu2Δ1 trp1Δ63 his3Δ200 Hrd1-13myc-HIS<br/>ubc7::KANR</i>               | This study            |
| <i>yPC3186</i> | <i>MATa ura3-52 leu2Δ1 trp1Δ63 his3Δ200 mini-Hrd1-13myc-<br/>KANR</i>                   | This study            |

|                |                                                                                                     |            |
|----------------|-----------------------------------------------------------------------------------------------------|------------|
| <i>yPC3338</i> | <i>MATa ura3-52 leu2Δ1 trp1Δ63 his3Δ200 Hrd1-13myc-KANR<br/>der1::HYGB</i>                          | This study |
| <i>yPC3339</i> | <i>MATa ura3-52 leu2Δ1 trp1Δ63 his3Δ200 Hrd1-13myc-KANR<br/>usa1::HIS</i>                           | This study |
| <i>yPC3340</i> | <i>MATa ura3-52 leu2Δ1 trp1Δ63 his3Δ200 Hrd1-13myc-KANR<br/>yos9::HYGB</i>                          | This study |
| <i>yPC3377</i> | <i>MATα ura3-52 leu2Δ1 trp1Δ63 his3Δ200 Hrd1-13myc-KANR<br/>der1::HIS yos9::HYGB</i>                | This study |
| <i>yPC3381</i> | <i>MATα ura3-52 leu2Δ1 trp1Δ63 his3Δ200 Hrd1-13myc-KANR<br/>usa1::HIS yos9::HYGB</i>                | This study |
| <i>yPC3390</i> | <i>MATa ura3-52 leu2Δ1 trp1Δ63 his3Δ200 hrd1::HYGB usa1::NAT</i>                                    | This study |
| <i>yPC3430</i> | <i>MATa ura3-52 leu2Δ1 trp1Δ63 his3Δ200 Hrd1-13myc-NAT<br/>hrd3::KANR GAPDH-HRD3::LEU2</i>          | This study |
| <i>yPC3431</i> | <i>MATa ura3-52 leu2Δ1 trp1Δ63 his3Δ200 Hrd1-13myc-NAT<br/>hrd3::KANR GAPDH-HRD3(357-833)::LEU2</i> | This study |
| <i>yPC3432</i> | <i>MATa ura3-52 leu2Δ1 trp1Δ63 his3Δ200 Hrd1-13myc-NAT<br/>hrd3::KANR GAPDH-HRD3(1-767)::LEU2</i>   | This study |
| <i>yPC3515</i> | <i>MATα ura3-52 leu2Δ1 trp1Δ63 his3Δ200 Hrd1-13myc-KANR<br/>der1::HIS usa1::NAT</i>                 | This study |

---

**Table S3. Plasmids used in this study**

| <b>Plasmid</b> | <b>Description</b>                          | <b>Source</b>         |
|----------------|---------------------------------------------|-----------------------|
| pDN431         | <i>CPY*-HA, CEN, URA</i>                    | Ng et al., 2000       |
| pSM70          | <i>KHN-HA, CEN, URA</i>                     | Vashist and Ng, 2004  |
| pESC-Bpa       | <i>TyrRS-tRNACUA</i> for pBpa incorporation | Chin et al., 2003     |
| pPC234         | <i>USA1, CEN, HIS</i>                       | This study            |
| pPC254         | <i>Usa1-HA, CEN, IEU</i>                    | Carvalho et al., 2006 |
| pPC289         | <i>FLAG-Usa1, CEN, HIS</i>                  | This study            |
| pPC312         | <i>Gal-Hrd1, CEN, LEU</i>                   | This study            |
| pPC321         | <i>Gal-Hrd1C399S, CEN, LEU</i>              | This study            |
| pPC364         | <i>Hrd1-13Myc, CEN, HIS</i>                 | This study            |
| pPC430         | <i>Hrd1C399S-13MYC, CEN, HIS</i>            | This study            |
| pPC448         | <i>Hrd1C399S-6his-3HA, CEN, LEU</i>         | This study            |
| pPC449         | <i>Hrd1-6his-3HA, CEN, LEU</i>              | This study            |
| pPC490         | <i>sCPY*-DHFR-HA, CEN, URA</i>              | This study            |
| pPC628         | <i>FLAG-Usa1(D319-524), CEN, HIS</i>        | This study            |
| pPC633         | <i>FLAG-Usa1(D319-371), CEN, HIS</i>        | This study            |
| pPC634         | <i>FLAG-Usa1(D319-418), CEN, HIS</i>        | This study            |
| pPC635         | <i>FLAG-Usa1(D491-524), CEN, HIS</i>        | This study            |
| pPC636         | <i>FLAG-Usa1(D437-490), CEN, HIS</i>        | This study            |
| pPC644         | <i>Usa1(D319-371), CEN, HIS</i>             | This study            |
| pPC645         | <i>Usa1(D319-418), CEN, HIS</i>             | This study            |
| pPC646         | <i>Usa1(D437-490), CEN, HIS</i>             | This study            |
